# Supplementary material for: A nicotinamide metabolism-related gene signature for predicting immunotherapy response and prognosis in lung adenocarcinoma patients
Source: PeerJ journal article supplement (doi:10.7717/peerj.18991), 2025-02-27
Supplement: MIQE_checklist.xls [file MIQE_checklist.xls]

## Sheet: Sheet1
ITEM TO CHECK	IMPORTANCE	CHECKLIST
EXPERIMENTAL DESIGN
Definition of experimental and control groups	E	Page9 Line191-192
Number within each group	E	Page9 Line191-192
Assay carried out by core lab or investigator's lab?	D	Not Applicable
Acknowledgement of authors' contributions	D	Not Applicable
SAMPLE
Description	E	Page9-10 Line191-201
Volume/mass of sample processed	D	Not Applicable
Microdissection or macrodissection	E	Page10 Line203-212
Processing procedure	E	Page10 Line203-212
If frozen - how and how quickly?	E	Page10 Line203-212
If fixed - with what, how quickly?	E	Page10 Line203-212
Sample storage conditions and duration (especially for FFPE samples)	E	Page10 Line203-212
NUCLEIC ACID EXTRACTION
Procedure and/or instrumentation	E	Page10 Line203-212
Name of kit and details of any modifications	E	Page10 Line203-212
Source of additional reagents used	D	Not Applicable
Details of DNase or RNAse treatment	E	Page10 Line203-212
Contamination assessment (DNA or RNA)	E	Page10 Line203-212
Nucleic acid quantification	E	Page10 Line203-212
Instrument and method	E	Page10 Line203-212
Purity (A260/A280)	D	Not Applicable
Yield	D	Not Applicable
RNA integrity method/instrument	E	Page10 Line203-212
RIN/RQI or Cq of 3' and 5' transcripts	E	Page10 Line203-212
Electrophoresis traces	D	Not Applicable
Inhibition testing (Cq dilutions, spike or other)	E	Page10 Line203-212
REVERSE TRANSCRIPTION
Complete reaction conditions	E	Page10 Line203-212
Amount of RNA and reaction volume	E	Page10 Line203-212
Priming oligonucleotide (if using GSP) and concentration	E	Page10 Line203-212
Reverse transcriptase and concentration	E	Page10 Line203-212
Temperature and time	E	Page10 Line203-212
Manufacturer of reagents and catalogue numbers	D	Not Applicable
Cqs with and without RT	D*	Not Applicable
Storage conditions of cDNA	D	Not Applicable
qPCR TARGET INFORMATION
If multiplex, efficiency and LOD of each assay.	E	Page10 Line203-212
Sequence accession number	E	Page10 Line203-212
Location of amplicon	D	Not Applicable
Amplicon length	E	Page10 Line203-212
In silico specificity screen (BLAST, etc)	E	Page10 Line203-212
Pseudogenes, retropseudogenes or other homologs?	D	Not Applicable
Sequence alignment	D	Not Applicable
Secondary structure analysis of amplicon	D	Not Applicable
Location of each primer by exon or intron (if applicable)	E	Page10 Line203-212
What splice variants are targeted?	E	Page10 Line203-212
qPCR OLIGONUCLEOTIDES
Primer sequences	E	Page10 Line203-212
RTPrimerDB Identification Number	D	Not Applicable
Probe sequences	D**	Not Applicable
Location and identity of any modifications	E	Page10 Line203-212
Manufacturer of oligonucleotides	D	Not Applicable
Purification method	D	Not Applicable
qPCR PROTOCOL
Complete reaction conditions	E	Page10 Line203-212
Reaction volume and amount of cDNA/DNA	E	Page10 Line203-212
Primer, (probe), Mg++ and dNTP concentrations	E	Page10 Line203-212
Polymerase identity and concentration	E	Page10 Line203-212
Buffer/kit identity and manufacturer	E	Page10 Line203-212
Exact chemical constitution of the buffer	D	Not Applicable
Additives (SYBR Green I, DMSO, etc.)	E	Page10 Line203-212
Manufacturer of plates/tubes and catalog number	D	Not Applicable
Complete thermocycling parameters	E	Page10 Line203-212
Reaction setup (manual/robotic)	D	Not Applicable
Manufacturer of qPCR instrument	E	Page10 Line203-212
qPCR VALIDATION
Evidence of optimisation (from gradients)	D	Not Applicable
Specificity (gel, sequence, melt, or digest)	E	Page10 Line203-212
For SYBR Green I, Cq of the NTC	E	Page10 Line203-212
Standard curves with slope and y-intercept	E	Page10 Line203-212
PCR efficiency calculated from slope	E	Page10 Line203-212
Confidence interval for PCR efficiency or standard error	D	Not Applicable
r2 of standard curve	E	Page10 Line203-212
Linear dynamic range	E	Page10 Line203-212
Cq variation at lower limit	E	Page10 Line203-212
Confidence intervals throughout range	D	Not Applicable
Evidence for limit of detection	E	Page10 Line203-212
If multiplex, efficiency and LOD of each assay.	E	Page10 Line203-212
DATA ANALYSIS
qPCR analysis program (source, version)	E	Page10 Line203-212
Cq method determination	E	Page10 Line203-212
Outlier identification and disposition	E	Page10 Line203-212
Results of NTCs	E	Page10 Line203-212
Justification of number and choice of reference genes	E	Page10 Line203-212
Description of normalisation method	E	Page10 Line203-212
Number and concordance of biological replicates	D	Not Applicable
Number and stage (RT or qPCR) of technical replicates	E	Page10 Line203-212
Repeatability (intra-assay variation)	E	Page10 Line203-212
Reproducibility (inter-assay variation, %CV)	D	Not Applicable
Power analysis	D	Not Applicable
Statistical methods for result significance	E	Page10 Line203-212
Software (source, version)	E	Page10 Line203-212
Cq or raw data submission using RDML	D	Not Applicable
Table 1. MIQE checklist for authors, reviewers and editors. All essential information (E) must be submitted with the manuscript. Desirable
information (D) should be submitted if available. If using primers obtained from RTPrimerDB, information on qPCR target, oligonucleotides,
protocols and validation is available from that source.
*: Assessing the absence of DNA using a no RT assay is essential when first extracting RNA. Once the sample has been validated as
RDNA-free, inclusion of a no-RT control is desirable, but no longer essential.
**: Disclosure of the probe sequence is highly desirable and strongly encouraged. However, since not all commercial pre-designed assay
vendors provide this information, it cannot be an essential requirement. Use of such assays is advised against.
