# Supplementary material for: A nicotinamide metabolism-related gene signature for predicting immunotherapy response and prognosis in lung adenocarcinoma patients
Source: PeerJ journal article supplement (doi:10.7717/peerj.18991), 2025-02-27
Supplement: Supplementary_Table_1.docx [file Supplementary_Table_1.docx]

**Supplementary Table 1. The primer sequences used in qRT‑PCR**

| Gene | Primers (5’-3’) |
| --- | --- |
| *KRT6A* | Forward: GTGACTCTGAAGAAGGATGT  Reverse: ACAGAGATGTTGACTTGTCC |
| *CPA3* | Forward: AGCAGACATCATAAAGGACT  Reverse: CTTCTCACTAACTCGGAAAT |
| *DKK1* | Forward: CAGACCATTGACAACTACC  Reverse: TTCTCCTATGCTTGGTACA |
| *GJB3* | Forward: TTGAGTTCCTCTTCCTCTAC  Reverse: AGATTTTCTTCTCGGTAGGT |
| *GAPDH* | Forward: CTACATGGTTTACATGTTCC  Reverse: CATACTTCTCATGGTTCACA |
